# Supplementary material
Source: PubMed Central journal article supplement (PMC6662218)
Supplement: NIHMS1533497-supplement-1.pdf [file NIHMS1533497-supplement-1.pdf]

1 Supplementary Materials for:

2 **How much of the sediment in Gale crater's central mound was fluvially**  
3 **transported?**

4

5 Bradley J. Thomson, Debra L. Buczkowski, Larry S. Crumpler, Kimberly D. Seelos, and  
6 Caleb I. Fassett

7

8 This PDF file includes:  
9 Supplementary Text  
10 Tables S1 to S4  
11 Figures S1 to S5  
12

### 13 **Supplementary Text**

14 This supplementary section provides: (1) a description of the data used; (2) an  
15 expanded description of our methodology; (3) an explanation of the uncertainty analysis  
16 and error propagation, and (4) an expanded description of the paleotopography scenario.  
17 Supplementary tables and figures are appended to the end of the text.

18 **(1) Source Data:** We used topography data from the Mars Orbital Laser  
19 Altimeter (MOLA) instrument (Smith et al., 1999) and digital elevation models (DEMs)  
20 derived from High Resolution Stereo Camera (HRSC) stereo images (Neukum and  
21 Jaumann, 2004) to measure morphometric parameters of the Gale sedimentary mound  
22 and surrounding fluvial channels. MOLA data are collated into gridded products with a  
23 pixel spacing 463 m (equivalent to 128 pixels per degree) (Smith et al., 2003). The polar  
24 orbit of MOLA on Mars Global Surveyor resulted in a dense network of altimetry  
25 measurements at high latitudes, but equatorial gaps of up to ten km. As the crater Gale

26 lies near the equator (it is centered at 5.4°S, 137.8°E), we used higher resolution HRSC  
27 DEMs supplement the MOLA gridded data. **Table S1** lists the HRSC DEMs used in this  
28 work. Four DEMs with a pixel spacing of 75 m cover the entire crater (**Fig. S1**) and a  
29 region to the west and constitute our main sources of topographic information; a higher  
30 resolution DEM (50 m pixel spacing) covers the western portion of the mound.

31 **(2) Methodology, valley network measurements:** First, the positions of valley  
32 networks required some manual adjustment (**Fig. S2**). *Hynek et al. (2010)* identified and  
33 mapped valley networks across Mars using THEMIS daytime infrared data mosaicked at  
34 231 m/pixel supplemented with MOLA topography. Since this time, both uncontrolled  
35 (Edwards et al., 2011) and controlled 100 m/pixel THEMIS mosaics have been produced  
36 (Ferguson et al., 2013), resulting in small offsets in the position of mapped features. Most  
37 features are only a few hundred meters offset from their previous mapped locations  
38 (typically 2-4 pixels), but some positional errors of up to 30 pixels or 3 km are apparent  
39 (Ferguson et al., 2013).

40 Each mapped valley network segment was assigned a stream order (Strahler,  
41 1957) by *Hynek et al. (2010)*; these were slightly revised as appropriate. In this system,  
42 channels without tributaries are designated as 1st-order. Where two 1st-order channels  
43 join, the downstream segment is designated an order of 2; where two second-order  
44 channels join, a segment of order 3 is formed; and so forth. However, if two channels join  
45 that are of different order (e.g., a segment of order 1 merging with an order 2 segment),  
46 the order of the downstream segment is not incremented – it retains the highest order of  
47 the upstream channel segment. To assess the eroded volume in Farah Vallis and the  
48 upstream valley network, we measured segment shapes in a region to the southwest of

49 Gale that lies within HRSC DEM h1960\_0000\_da4. Profiles across selected channel  
50 segments were extracted from the DEM, and these were analyzed to determine the  
51 channel's cross-sectional area. The area was taken to be the difference between the  
52 current ground level and an assumed pre-erosional surface. **Table S2** provides a listing of  
53 all profiles collected and measured for this project. Three to four profiles were averaged  
54 together for each segment. As expected, lower-order channel segments typically have  
55 smaller cross-sectional areas than higher-order segments.

56 All cross-sectional area measurements of a given stream order (i.e., 1, 2, 3, or 4)  
57 were then combined using length-weighted median values that represent typical channel  
58 dimensions of each type (**Table S3**). The combined sum of these figures represents our  
59 estimate of total eroded volume of this valley network. One complicating factor is that for  
60 second-order valley network segments in particular, we observed that the choice of  
61 method for determining "typical" cross-sectional area values resulted in a notably large  
62 difference. As evidenced in the histogram below (**Figure S3**), the population of area  
63 values is distinctly bi-modal. While the majority of areas are  $<0.1 \text{ km}^2$ , a subset of larger  
64 features fall between  $0.1$  and  $0.6 \text{ km}^2$ . The median cross-sectional area is  $0.12 \text{ km}^2$ , near  
65 the low end of the range of values. The weighted, length-normalized median area is  $0.36$   
66  $\text{km}^2$ , which is a factor of three higher. To address this, we have computed the weighted  
67 median of 2nd order channel segments less than and greater than  $0.1 \text{ km}^2$  separately. The  
68 weighted median of small channels is  $0.0435 \text{ km}^2$ , and the weighted median of large  
69 channels is  $0.388 \text{ km}^2$ . A simple average of these two weighted medians is  $0.216 \text{ km}^2$ ,  
70 and this is the value we adopt in **Table S3**. A bar chart that summarizes the water-  
71 mobilized sediment volume compared to the mound volume is given in **Figure S4**.

72           **(3) Error propagation.** Our eroded valley network volume estimate is the sum of  
73 four products (equation S1):

$$74 \qquad V_{vn} = a_1L_1 + a_2L_2 + a_3L_3 + a_4L_4. \qquad (S1)$$

75 Here,  $V_{vn}$  is the total cumulative volume of the valley network,  $a_1$  to  $a_4$  are the mean  
76 cross-sectional areas of stream order 1 to 4, respectively, and  $L_1$  to  $L_4$  are the total  
77 cumulative lengths of stream order types 1 to 4, respectively (**Table S3**). The uncertainty  
78 in  $V_{vn}$  is dominated by the uncertainty in the mean areas; uncertainty in the length values  
79 is likely <1% and they are neglected in equation S2. The uncertainty in the volume  
80 calculation can be estimated using fractional uncertainties:

$$81 \qquad \delta V_{vn} = V_{vn} \sqrt{\frac{\delta a_1}{a_1} + \frac{\delta a_2}{a_2} + \frac{\delta a_3}{a_3} + \frac{\delta a_4}{a_4}} \qquad (S2)$$

82           In Eq. S2,  $\delta a_1$  to  $\delta a_4$  are the uncertainty in the cross-sectional area averages, taken  
83 here to be the standard deviations. This results in a formal uncertainty of  $12.5 \times 10^3 \text{ km}^3$ , a  
84 value that is 150% larger than the volume of  $8 \times 10^3 \text{ km}^3$ . Despite the fact that this valley  
85 network volume estimate is uncertain to within a factor of two, it is still almost an order  
86 of magnitude smaller than the mound volume (which approaches  $\sim 10^5 \text{ km}^3$ ).

87           The mound volume was determined by tabulating the difference between the  
88 current surface elevation and the assumed base elevation of -4.5 km, yielding a volume of  
89  $9414 \text{ km}^3$ . To estimate the uncertainty in our estimate of the volume of the mound, we  
90 buffered the enclosed polygon that represents the mapped outermost extent of the mound  
91 (Thomson et al., 2011) one MOLA pixel (463 m) inward and outwards to obtain  
92 minimum ( $9301 \text{ km}^3$ ) and maximum ( $9520 \text{ km}^3$ ) error estimates, respectively. Thus we  
93 obtain our reported value of  $9.4 \pm 0.1 \times 10^3 \text{ km}^3$ . However, there is an additional  
94 component of uncertainty related to the assumed base elevation surface under the Gale

95 mound. Below we conduct a sensitivity analysis to explore how the mound volume (and  
96 by extension, the lower elevation level) varies given the choice of this parameter.

97         In the topographic profile of Gale given in **Figure S5**, the north-south topographic  
98 asymmetry of the crater is evident. The crater floor in the northern section of the crater  
99 lies more than 1 km deeper than the floor to the south of this crater. This asymmetry  
100 could be partly attributed to intrinsic factors such as Gale's formation on the northward-  
101 dipping dichotomy boundary or post-impact tilt, or it could reflect a depositional or  
102 erosional asymmetry that affected the infilling material.

103         We consider four potential base level surfaces to explore their effect on the  
104 volume calculations presented in this paper. First, we consider mound with a flat base at  
105  $-4.5$  km. Second, we consider a plane fit to the measured mound base elevation levels.  
106 Finally, following the approach of *Gabasova and Kite (2018)*, we scale a radially  
107 averaged profile of a fresh example of complex martian crater (Tooting, 27.86 km in  
108 diameter) and a profile of a relatively fresh peak-ring crater (Galle, 223.5 km in diameter)  
109 to match the diameter of Gale using depth-diameter scaling relationships from *Tornabene*  
110 *et al.* (2013). These basal surfaces are given in **Fig. S5**; the resulting mound volumes are  
111 tabulated below.

112         As given in **Table S4**, three of the four basal surfaces considered (i.e., a flat plane,  
113 scaled Tooting crater, and scaled Galle basin) give reasonably consistent results, i.e., the  
114 volume of the mound is  $\sim 9.4$  to  $9.6 \times 10^3$  km<sup>3</sup>. For the third basal surface considered,  
115 however, the mound volume is  $\sim 6 \times 10^3$  km<sup>3</sup>, which is about one-third less than the other  
116 cases. While this result does not alter the conclusion that the overwhelming majority of  
117 the mound in Gale is not attributable to aqueous transport processes, the elevation level

118 that constitutes the boundary between the lower and intermediate elevation zone is more  
119 than 0.8 km higher than the other cases. Therefore, we consider this to be reflective the  
120 overall uncertainty associated with this elevation value. Accordingly, we have identified  
121 a range of elevation values on the mound in Figures 1 and 3.

#### 122 **(4) Paleotopography scenario.**

123 Topography of the southern half of Gale was used to estimate the current average  
124 crater rim height of  $0.58 \pm 0.41$  km (Grotzinger et al., 2015). Based on measurements of  
125 other morphologically fresh craters between  $40^\circ\text{S}$  and  $40^\circ\text{N}$  (Robbins and Hynek, 2012),  
126 the initial rim height of Gale is estimated to have been  $\sim 1.6$  km. The difference between  
127 the observed and expected rim height suggests  $\sim 1$  km of net vertical erosion (Grotzinger  
128 et al., 2015), but the authors concede that this value is likely an overestimate based on  
129 preservation of Gale's ejecta blanket (Irwin et al., 2005). Using a geometric model of the  
130 potential sediment yield from this magnitude of wall erosion, Grotzinger et al. (2015)  
131 estimate that  $\sim 9 \times 10^3$  km<sup>3</sup> of sediment could have delivered to the crater floor, a value that  
132 we note is roughly equivalent to the present-day mound volume. Assuming that the  
133 density of eroded and deposited material is the same (an assumption made by Grotzinger  
134 et al. [2015]), this yields 0.5 to 0.6 km of deposition over the 18,250 km<sup>2</sup> area of the  
135 crater floor, exclusive of the central peak region.

136 Based on rover observations of the exposed stratigraphy in Aeolis Mons, it also  
137 has been estimated that there was at least  $\sim 1$  km of sediment present above the current  
138 crater floor that has since been eroded away (Grotzinger et al., 2015; Fedo et al., 2017).  
139 The preferred interpretation of the exposed stratigraphy is that it represents fluvial-deltaic  
140 deposits that undergo lateral facies transitions into fine-grained lacustrine deposits. The

141 inferred sediment transport direction in these deposits is generally southward, i.e., toward  
142 the current mound, a geometry that would necessitate the presence of a now-eroded  
143 sequence of sediments in the gap between the crater walls and current mound.

144         The precise geometry of this now-eroded sedimentary sequence is necessarily  
145 speculative. The simplest configuration is to consider this volume of material spread  
146 uniformly from the crater wall toward central peak, accounting for a depth of 0.5 to 0.6  
147 km of material (after Grotzinger et al., 2015). Additional sources of sediment considered  
148 in this current analysis collectively constitute  $\sim 1.3 \times 10^3 \text{ km}^3$ , a volume that would account  
149 for a 70 m thick deposit if spread uniformly over the same area or about 300 m thick if  
150 tallied within the context of the existing mound topography. The lower elevation  
151 boundary would be  $-3.7 \text{ km}$  in a flat plane is assumed for the basal boundary of the  
152 mound (**Table S5**).

153         There are several complicating factors with the deep burial and exhumation  
154 scenario. One paradoxical element of this scenario is that it would appear to require more  
155 sediment than visible means of transport into Gale would permit. Eolian processes such as  
156 the settling of dust or volcanic ash could be one potential mechanism that could  
157 contribute additional sediment into Gale. However, the grain-size segregation necessary  
158 to create the observed fine laminae is more likely in water, and therefore the settling of  
159 fine grains directly from the atmosphere “is excluded... .. as a primary sediment  
160 accumulation mechanism [of the lower mound]” (Grotzinger et al., 2015). Evaporite  
161 sequences, perhaps delivered by groundwater, are another means to introduce material,  
162 but rover evidence suggests that the evaporitic material is pore-filling, not matrix-forming  
163 (e.g., Rampe et al., 2017).

164           The observed depth of Gale presents another potential complication to this  
165 scenario—local sediment sources and sinks inside the crater are out of balance by a factor  
166 of 2 to 4 in favor of the latter. Again using measurements of morphologically fresh  
167 craters (Robbins and Hynes, 2012), the initial depth of a crater Gale’s size is estimated to  
168 have been 4.0 to 5.0 km; the current depth is  $3.1\pm 0.7$  km (Grotzinger et al., 2015). The  
169 difference between the observed depth and expected depth range is 0.9 to 1.9 km,  
170 suggesting the crater has been shallowed by sedimentary infill. Yet the volume of  
171 sediment potentially shed from the walls is not sufficient to account for the inferred 1 to 2  
172 km of shallowing.

173           Finally, two recent rover-based observations support the notion that former  
174 burial depths have been minimal in Gale. The first is observations that the compressive  
175 strength of rock drilled by the MSL rover range from very weak to medium strong (Peters  
176 et al., 2018). The presence of very weak rocks (i.e., with inferred compressive strengths  
177  $\sim 5$  MPa) is not straightforwardly compatible with deep burial and exhumation. Second,  
178 accelerometer data on MSL has been used to infer the near-surface density of the terrain  
179 over which the rover has traversed (Lewis et al., 2019). The inferred average density  
180 value of  $1.680\pm 0.180$  g/cm<sup>3</sup> is low, and value indicates a high porosity ( $40\pm 6\%$ ). As  
181 stated by Lewis et al., “This is a typical value for soils and poorly lithified sediments, but  
182 porosity is typically reduced in sedimentary rocks that have experienced burial and  
183 compaction.”

184

185

186 **References cited in Supplementary Section**



187 Edwards, C. S., Nowicki, K. J., Christensen, P. R., Hill, J., Gorelick, N., and Murray, K.,  
188 2011, Mosaicking of global planetary image datasets: 1. Techniques and data  
189 processing for Thermal Emission Imaging System (THEMIS) multi - spectral  
190 data: *Journal of Geophysical Research*, v. 116, no. E10008.

191 Fedo, C. M., et al., 2017, Facies Analysis and Basin Architecture of the Upper Part of the  
192 Murray Formation, Gale Crater, Mars, Lunar and Planetary Science Conference,  
193 Volume 48.

194 Ferguson, R. L., Lee, E. M., and Weller, L., 2013, THEMIS geodetically controlled  
195 mosaics of Mars, Lunar and Planetary Science Conference, Volume 44: Houston,  
196 Texas, Lunar and Planetary Institute, p. abstract #1642.

197 Gabasova, L. R., and Kite, E. S., 2018, Compaction and sedimentary basin analysis on  
198 Mars: *Planetary and Space Science*, v. 152, p. 86-106.

199 Grotzinger, J. P., et al., 2015, Deposition, exhumation, and paleoclimate of an ancient  
200 lake deposit, Gale crater, Mars: *Science*, v. 350, no. 6257, p. aac7575.

201 Hynek, B. M., Beach, M., and Hoke, M. R. T., 2010, Updated global map of Martian  
202 valley networks and implications for climate and hydrologic processes: *Journal of*  
203 *Geophysical Research*, v. 115, p. 09008.

204 Irwin, R. P., Howard, A. D., Craddock, R. A., and Moore, J. M., 2005, An intense  
205 terminal epoch of widespread fluvial activity on early Mars: 2. Increased runoff  
206 and paleolake development: *Journal of Geophysical Research*, v. 110, p. E12S15.

207 Lewis, K. W., Peters, S., Gonter, K., Morrison, S., Schmerr, N., Vasavada, A. R., and  
208 Gabriel, T., 2019, A surface gravity traverse on Mars indicates low bedrock  
209 density at Gale crater: *Science*, v. 363, no. 6426, p. 535-537.

210 Neukum, G., and Jaumann, R., 2004, HRSC: The High Resolution Stereo Camera of  
211 Mars Express, *in* Wilson, A., ed., *Mars Express: The Scientific Payload*, Volume  
212 *ESA Special Publication 1240*, p. 17-35.

213 Peters, G. H., et al., 2018, Uniaxial compressive strengths of rocks drilled at Gale crater,  
214 Mars: *Geophysical Research Letters*, v. 45, p. 108-116.

215 Rampe, E., et al., 2017, Mineralogy of an ancient lacustrine mudstone succession from  
216 the Murray formation, Gale crater, Mars: *Earth and Planetary Science Letters*, v.  
217 471, p. 172-185.

218 Robbins, S. J., and Hynek, B. M., 2012, A new global database of Mars impact craters  $\geq$  1  
219 km: 2. Global crater properties and regional variations of the simple - to -  
220 complex transition diameter: *Journal of Geophysical Research*, v. 117, no. E6.

221 Smith, D., Neumann, G., Arvidson, R. E., Guinness, E. A., and Slavney, S., 2003, Mars  
222 Global Surveyor Laser Altimeter Mission Experiment Gridded Data Record:  
223 *NASA Planetary Data System*.

224 Smith, D. E., et al., 1999, The global topography of Mars and implications for surface  
225 evolution: *Science*, v. 284, no. 5419, p. 1495-1503.

226 Strahler, A. N., 1957, Quantitative analysis of watershed geomorphology: *Transactions*,  
227 *American Geophysical Union*, v. 38, p. 913-920.

228 Thomson, B. J., et al., 2011, Constraints on the origin and evolution of the layered mound  
229 in Gale Crater, Mars using Mars Reconnaissance Orbiter data: *Icarus*, v. 214, p.  
230 413-432.

231 Tornabene, L. L., Ling, V., Osinski, G. R., Boyce, J. M., Harrison, T. N., and McEwen,  
232 A. S., A revised global depth-diameter scaling relationship for Mars based on

233 pitted impact melt-bearing craters, *in* Proceedings Lunar and Planetary Science  
 234 Conference2013, Volume 44, p. abstract #2592.  
 235

236

237 **Table S1:** List of HRSC Digital Elevation Models (DEMs) of Gale and vicinity

| <i>HRSC product ID</i> | <i>Resolution (m)</i> | <i>Comments</i>                            |
|------------------------|-----------------------|--------------------------------------------|
| h1916_0000_da4         | 75                    | Includes eastern portion of Gale           |
| h1927_0000_da4         | 75                    | Includes central portion of Gale           |
| h1938_0000_da4         | 75                    | Includes western portion of Gale           |
| h1960_0000_da4         | 75                    | Includes part of valley network SW of Gale |
| h5273_0000_da4         | 75                    | Includes western half of Gale              |
| h4235_0001_da4         | 50                    | Includes western half of Gale              |

238

239

240

241

242

**Table S2:** Valley network segment measurements

| <i>Object ID</i> | <i>Stream Order</i> | <i>Center Lat (°N)</i> | <i>Center Lon (°E)</i> | <i>Cross-sectional Area [km<sup>2</sup>]</i> | <i>Segment Length [km]</i> | <i>Mean Area [km<sup>2</sup>]</i> | <i>Std. Dev. [km<sup>2</sup>]</i> |
|------------------|---------------------|------------------------|------------------------|----------------------------------------------|----------------------------|-----------------------------------|-----------------------------------|
| 454 a            | 1                   | -7.783                 | 134.338                | 0.077                                        | 21.3                       | 0.08                              | 0.01                              |
| 454 b            | 1                   | -7.861                 | 134.401                | 0.092                                        |                            |                                   |                                   |
| 454 c            | 1                   | -7.924                 | 134.456                | 0.073                                        |                            |                                   |                                   |
| 451 a            | 1                   | -7.730                 | 134.746                | 0.060                                        | 13.0                       | 0.11                              | 0.07                              |
| 451 b            | 1                   | -7.750                 | 134.744                | 0.032                                        |                            |                                   |                                   |
| 451 c            | 1                   | -7.810                 | 134.765                | 0.158                                        |                            |                                   |                                   |
| 409 a            | 1                   | -8.432                 | 134.178                | 0.015                                        | 5.6                        | 0.05                              | 0.03                              |
| 409 b            | 1                   | -8.453                 | 134.193                | 0.070                                        |                            |                                   |                                   |
| 409 c            | 1                   | -8.481                 | 134.202                | 0.058                                        |                            |                                   |                                   |
| 387 a            | 1                   | -8.823                 | 134.106                | 0.057                                        | 21.5                       | 0.18                              | 0.20                              |
| 387 b            | 1                   | -8.665                 | 134.275                | 0.417                                        |                            |                                   |                                   |
| 387 c            | 1                   | -8.611                 | 134.313                | 0.073                                        |                            |                                   |                                   |
| 390 a            | 1                   | -8.668                 | 134.340                | 0.328                                        | 8.3                        | 0.15                              | 0.16                              |
| 390 b            | 1                   | -8.646                 | 134.340                | 0.083                                        |                            |                                   |                                   |
| 390 c            | 1                   | -8.600                 | 134.322                | 0.040                                        |                            |                                   |                                   |
| 397 a            | 1                   | -8.611                 | 134.599                | 0.111                                        | 12.3                       | 0.11                              | 0.01                              |
| 397 b            | 1                   | -8.506                 | 134.531                | 0.096                                        |                            |                                   |                                   |
| 397 c            | 1                   | -8.491                 | 134.524                | 0.126                                        |                            |                                   |                                   |
| 518 a            | 1                   | -8.280                 | 134.016                | 0.041                                        | 5.6                        | 0.03                              | 0.01                              |
| 518 b            | 1                   | -8.275                 | 134.043                | 0.033                                        |                            |                                   |                                   |
| 518 c            | 1                   | -8.491                 | 134.524                | 0.014                                        |                            |                                   |                                   |
| 521 a            | 1                   | -8.187                 | 134.057                | 0.023                                        | 6.6                        | 0.04                              | 0.03                              |
| 521 b            | 1                   | -8.230                 | 134.072                | 0.078                                        |                            |                                   |                                   |
| 521 c            | 1                   | -8.256                 | 134.085                | 0.020                                        |                            |                                   |                                   |
| 520 a            | 1                   | -8.349                 | 134.046                | 0.005                                        | 5.6                        | 0.04                              | 0.04                              |
| 520 b            | 1                   | -8.340                 | 134.081                | 0.083                                        |                            |                                   |                                   |
| 520 c            | 1                   | -8.321                 | 134.091                | 0.019                                        |                            |                                   |                                   |
| 519 a            | 1                   | -8.372                 | 134.095                | 0.048                                        | 7.5                        | 0.05                              | 0.03                              |

| <i>Object ID</i> | <i>Stream Order</i> | <i>Center Lat (°N)</i> | <i>Center Lon (°E)</i> | <i>Cross-sectional Area [km<sup>2</sup>]</i> | <i>Segment Length [km]</i> | <i>Mean Area [km<sup>2</sup>]</i> | <i>Std. Dev. [km<sup>2</sup>]</i> |
|------------------|---------------------|------------------------|------------------------|----------------------------------------------|----------------------------|-----------------------------------|-----------------------------------|
| 519 b            | 1                   | -8.368                 | 134.101                | 0.080                                        |                            |                                   |                                   |
| 519 c            | 1                   | -8.335                 | 134.130                | 0.024                                        |                            |                                   |                                   |
| 408 a            | 1                   | -8.415                 | 134.286                | 0.039                                        | 12.2                       | 0.08                              | 0.04                              |
| 408 b            | 1                   | -8.371                 | 134.321                | 0.096                                        |                            |                                   |                                   |
| 408 c            | 1                   | -8.316                 | 134.335                | 0.118                                        |                            |                                   |                                   |
| 415 a            | 1                   | -8.339                 | 134.418                | 0.053                                        | 9.5                        | 0.06                              | 0.01                              |
| 415 b            | 1                   | -8.294                 | 134.386                | 0.054                                        |                            |                                   |                                   |
| 415 c            | 1                   | -8.264                 | 134.333                | 0.071                                        |                            |                                   |                                   |
| 430 a            | 1                   | -8.132                 | 134.320                | 0.059                                        | 6.5                        | 0.08                              | 0.02                              |
| 430 b            | 1                   | -8.154                 | 134.355                | 0.097                                        |                            |                                   |                                   |
| 430 c            | 1                   | -8.186                 | 134.369                | 0.088                                        |                            |                                   |                                   |
| 402 a            | 2                   | -8.477                 | 134.268                | 0.525                                        | 20.4                       | 0.45                              | 0.08                              |
| 402 b            | 2                   | -8.390                 | 134.362                | 0.452                                        |                            |                                   |                                   |
| 402 c            | 2                   | -8.450                 | 134.465                | 0.368                                        |                            |                                   |                                   |
| 395 a2           | 2                   | -8.594                 | 134.039                | 0.334                                        | 46.5                       | 0.39                              | 0.06                              |
| 395 b            | 2                   | -8.512                 | 134.166                | 0.388                                        |                            |                                   |                                   |
| 395 c            | 2                   | -8.515                 | 134.193                | 0.461                                        |                            |                                   |                                   |
| 399 a            | 2                   | -8.566                 | 134.318                | 0.149                                        | 14.3                       | 0.25                              | 0.12                              |
| 399 b            | 2                   | -8.542                 | 134.388                | 0.384                                        |                            |                                   |                                   |
| 399 c            | 2                   | -8.521                 | 134.414                | 0.219                                        |                            |                                   |                                   |
| 522-523 a        | 2                   | -8.293                 | 134.098                | 0.056                                        | 4.2                        | 0.06                              | 0.02                              |
| 522-523 b        | 2                   | -8.307                 | 134.101                | 0.085                                        |                            |                                   |                                   |
| 522-523 c        | 2                   | -8.316                 | 134.113                | 0.040                                        |                            |                                   |                                   |
| 522-523 d        | 2                   | -8.321                 | 134.128                | 0.071                                        |                            |                                   |                                   |
| 420 a            | 2                   | -8.324                 | 134.143                | 0.204                                        | 12.9                       | 0.35                              | 0.14                              |
| 420 b            | 2                   | -8.326                 | 134.179                | 0.479                                        |                            |                                   |                                   |
| 420 c            | 2                   | -8.285                 | 134.269                | 0.358                                        |                            |                                   |                                   |
| 516 a            | 2                   | -8.105                 | 134.455                | 0.044                                        | 8.0                        | 0.04                              | 0.02                              |
| 516 b            | 2                   | -8.084                 | 134.477                | 0.057                                        |                            |                                   |                                   |
| 516 c            | 2                   | -8.059                 | 134.513                | 0.036                                        |                            |                                   |                                   |
| 516 d            | 2                   | -8.039                 | 134.513                | 0.011                                        |                            |                                   |                                   |
| 422-424 a        | 2                   | -8.233                 | 134.312                | 0.089                                        | 5.3                        | 0.08                              | 0.03                              |
| 422-424 b        | 2                   | -8.207                 | 134.345                | 0.043                                        |                            |                                   |                                   |
| 422-424 c        | 2                   | -8.197                 | 134.363                | 0.098                                        |                            |                                   |                                   |
| 426-427-438 a    | 2                   | -8.185                 | 134.393                | 0.023                                        | 7.9                        | 0.10                              | 0.13                              |
| 426-427-438 b    | 2                   | -8.171                 | 134.422                | 0.037                                        |                            |                                   |                                   |
| 426-427-438 c    | 2                   | -8.123                 | 134.442                | 0.252                                        |                            |                                   |                                   |
| 404-405 a        | 3                   | -8.477                 | 134.500                | 0.230                                        | 29.1                       | 0.30                              | 0.14                              |
| 404-405 b        | 3                   | -8.448                 | 134.588                | 0.192                                        |                            |                                   |                                   |
| 404-405 c        | 3                   | -8.309                 | 134.630                | 0.509                                        |                            |                                   |                                   |
| 404-405 d        | 3                   | -8.156                 | 134.639                | 0.268                                        |                            |                                   |                                   |
| 524 a            | 3                   | -8.037                 | 134.545                | 0.110                                        | 8.1                        | 0.15                              | 0.04                              |
| 439 b            | 3                   | -8.072                 | 134.592                | 0.159                                        |                            |                                   |                                   |
| 529 c            | 3                   | -8.084                 | 134.616                | 0.179                                        |                            |                                   |                                   |
| 528 a            | 4                   | -8.057                 | 134.662                | 0.223                                        | 6.2                        | 0.28                              | 0.09                              |
| 528 b            | 4                   | -8.039                 | 134.684                | 0.237                                        |                            |                                   |                                   |
| 528 c            | 4                   | -8.038                 | 134.716                | 0.377                                        |                            |                                   |                                   |
| 429 a            | 4                   | -8.062                 | 134.753                | 0.400                                        | 16.1                       | 0.27                              | 0.12                              |
| 429 b            | 4                   | -8.116                 | 134.792                | 0.165                                        |                            |                                   |                                   |
| 429 c            | 4                   | -8.148                 | 134.832                | 0.234                                        |                            |                                   |                                   |
| 431 a            | 4                   | -8.139                 | 134.966                | 0.466                                        | 6.4                        | 0.63                              | 0.29                              |
| 431 b            | 4                   | -8.121                 | 134.994                | 0.456                                        |                            |                                   |                                   |
| 431 c            | 4                   | -8.097                 | 135.005                | 0.965                                        |                            |                                   |                                   |

| <i>Object ID</i> | <i>Stream Order</i> | <i>Center Lat (°N)</i> | <i>Center Lon (°E)</i> | <i>Cross-sectional Area [km<sup>2</sup>]</i> | <i>Segment Length [km]</i> | <i>Mean Area [km<sup>2</sup>]</i> | <i>Std. Dev. [km<sup>2</sup>]</i> |
|------------------|---------------------|------------------------|------------------------|----------------------------------------------|----------------------------|-----------------------------------|-----------------------------------|
| 432 a            | 4                   | -8.097                 | 135.053                | 0.307                                        | 53.5                       | 0.21                              | 0.09                              |
| 432 b            | 4                   | -8.013                 | 135.235                | 0.154                                        |                            |                                   |                                   |
| 432 c            | 4                   | -7.999                 | 135.276                | 0.158                                        |                            |                                   |                                   |

243  
244  
245

**Table S3:** Cumulative volume by stream order

| <i>Stream Order</i>                             | <i>Normalized Median Area [km<sup>2</sup>]</i> | <i>Stand. Dev. [km<sup>2</sup>]</i> | <i>Total Length [km]</i> | <i>Volume [km<sup>3</sup>]</i> |
|-------------------------------------------------|------------------------------------------------|-------------------------------------|--------------------------|--------------------------------|
| 1                                               | 0.07                                           | 0.08                                | 2970                     | 218                            |
| 2                                               | 0.22                                           | 0.17                                | 1203                     | 260                            |
| 3                                               | 0.23                                           | 0.13                                | 574                      | 132                            |
| 4                                               | 0.31                                           | 0.21                                | 645                      | 198                            |
| <b>Total Cumulative Volume [km<sup>3</sup>]</b> |                                                |                                     |                          | <b>808</b>                     |

246  
247

**Table S4:** Gale basal elevation options with modern topography given in Fig. S4

| <i>Assumed basal topography</i> | <i>Current mound volume [km<sup>3</sup>]</i> | <i>Lower elevation level [km]</i> | <i>Ratio volume moved by water to mound volume</i> | <i>Fraction of volume moved by water</i> |
|---------------------------------|----------------------------------------------|-----------------------------------|----------------------------------------------------|------------------------------------------|
| Flat base                       | 9410                                         | -4.21                             | 1 : 7.54                                           | 13.3%                                    |
| Inclined plane                  | 6070                                         | -3.47                             | 1 : 4.87                                           | 20.5%                                    |
| Tooting crater, scaled          | 9480                                         | -4.25                             | 1 : 7.59                                           | 13.2%                                    |
| Galle basin, scaled             | 9630                                         | -4.27                             | 1 : 7.71                                           | 13.0%                                    |

250  
251  
252  
253

**Table S5:** Gale basal elevation options with inferred paleotopography

| <i>Assumed basal topography</i> | <i>Mound paleovolume [km<sup>3</sup>]</i> | <i>Lower elevation level [km]</i> |
|---------------------------------|-------------------------------------------|-----------------------------------|
| Flat base                       | 18400                                     | -3.67                             |
| Inclined plane                  | 15100                                     | -3.34                             |
| Tooting crater, scaled          | 18500                                     | -3.66                             |
| Galle basin, scaled             | 18600                                     | -3.67                             |

254



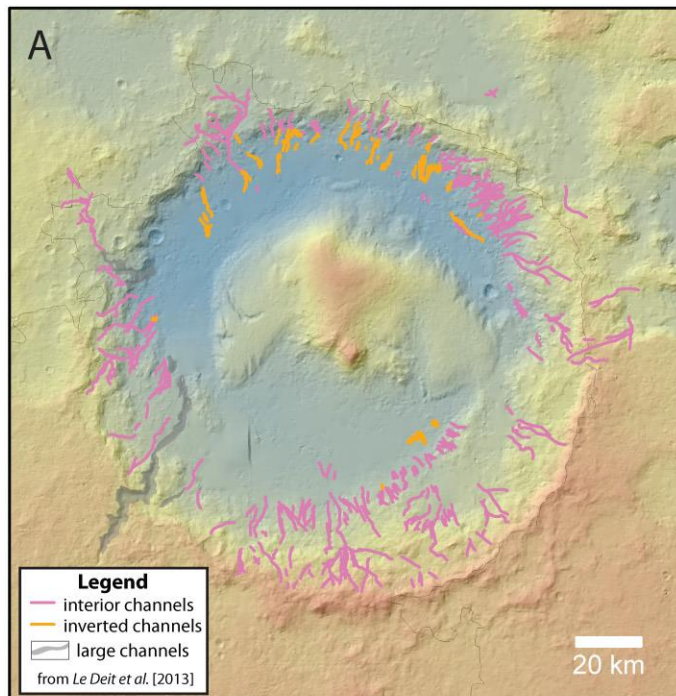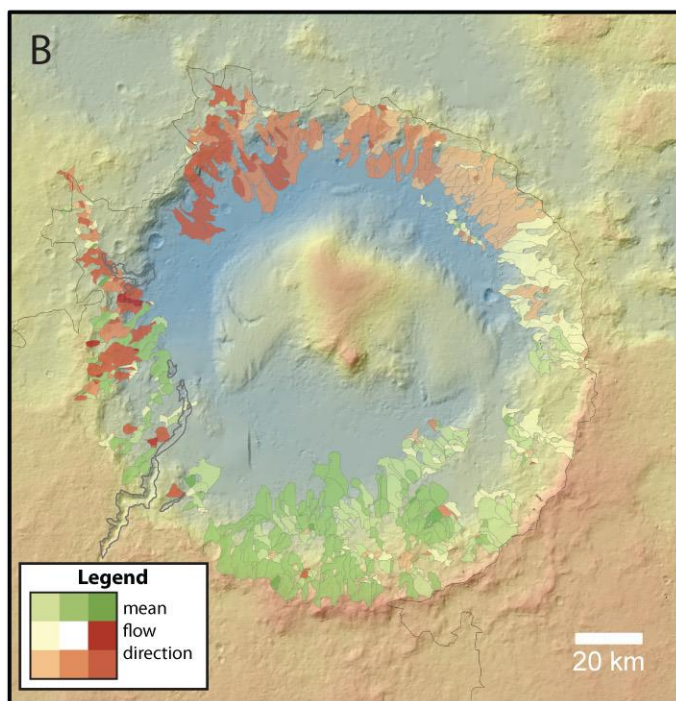

256  
257  
258  
259  
260  
261  
262

**Figure S1.** Shaded relief map of Gale crater from HRSC-derived topography. **(a)** Interior channels and inverted channels are given in pink and orange respectively [from *Le Deit et al.*, 2013]; larger inward-draining channels are outlined in gray. **(b)** Same view as Fig. 1a indicating sub-divided interior watersheds. The N=705 separate watersheds are assigned colors based on their mean flow direction.

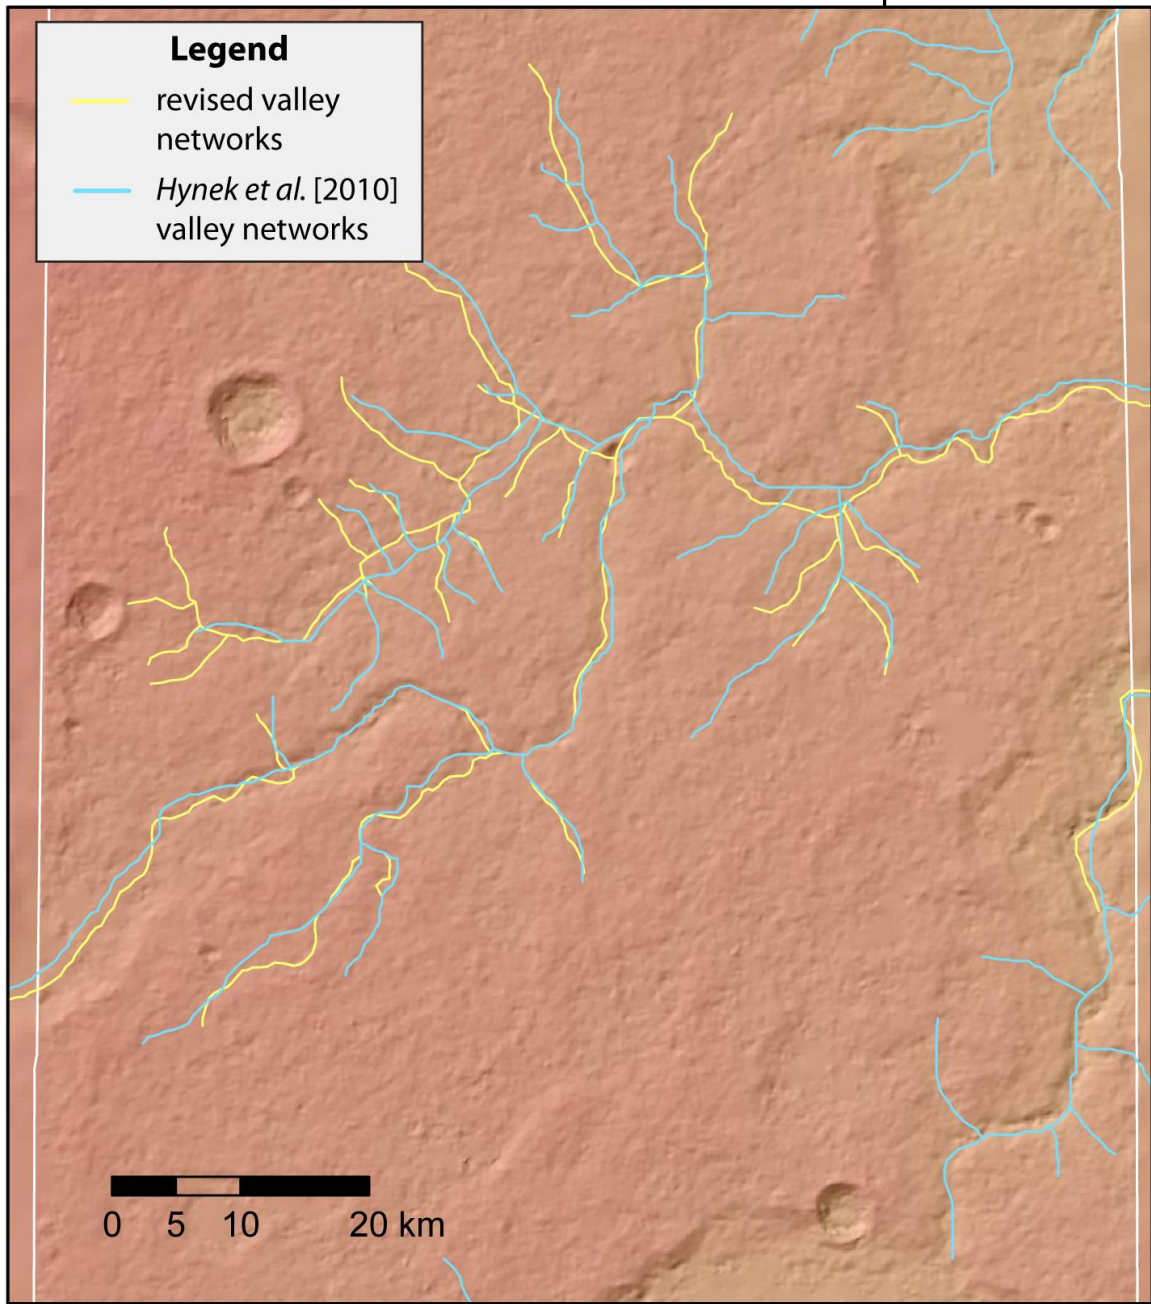

263  
264  
265  
266  
267

**Figure S2.** Comparison of valley networks mapped by Hynek et al (2010) (given in blue) with those re-mapped in this study (given in yellow). White border marks extent of HRSC DEM H1960\_0000; background is MOLA shaded relief map.

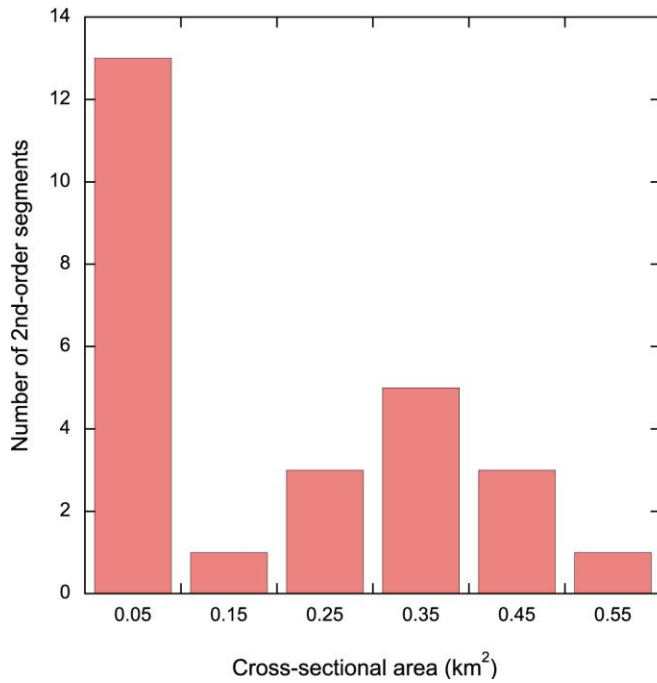

268  
269  
270  
271  
272

**Figure S3.** Histogram of the cross-sectional areas of second-order valley network segments. X-axis labels are bin centers; tick marks are at increments of 0.1 km<sup>2</sup>.



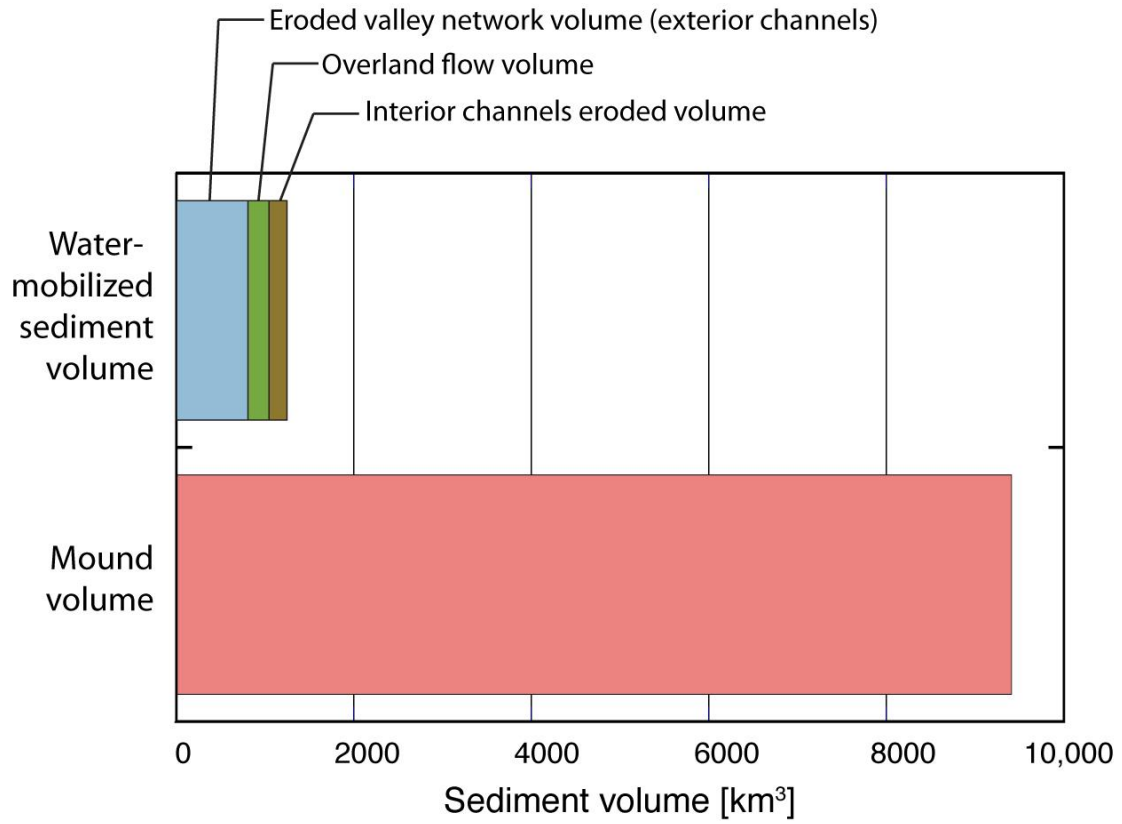

274  
275  
276  
277

**Figure S4.** Comparison of the volume of sediment mobilized by water with the total volume of sediment in the mound.

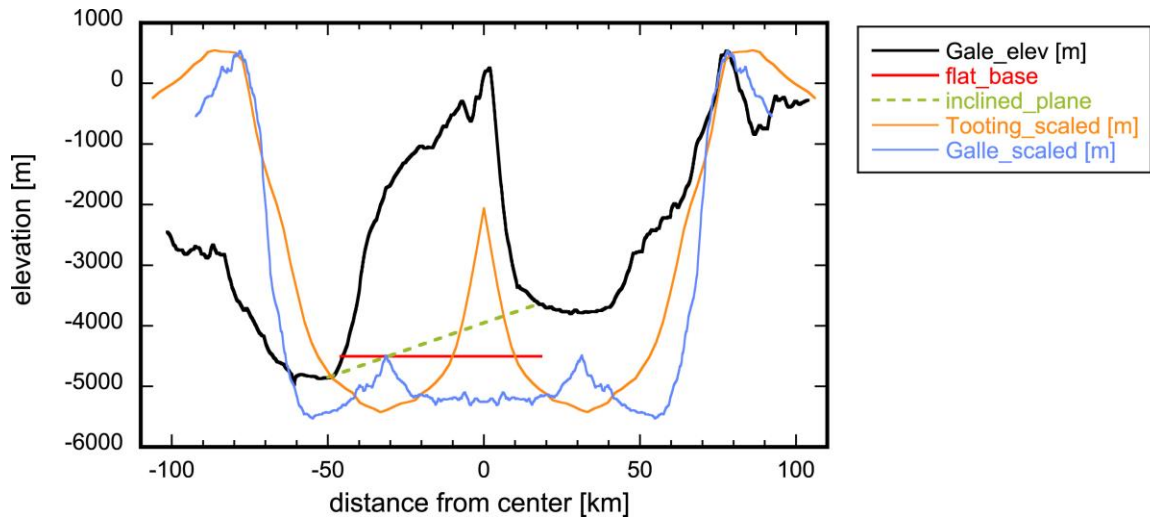

278  
 279  
 280  
 281  
 282  
 283  
 284  
 285

**Figure S5.** Two-segment topographic profile of Gale crater from north to south in black. Given in red is flat base elevation level of  $-4.5$  km; the dashed green line is an inclined plane fit the mound base. The orange and blue curves are radially averaged profiles of Tooting crater and the Galle basin, respectively, from *Gabasova and Kite* (2018) that were scaled to Gale's diameter (*Tornabene et al.*, 2013).
